# Supplementary material for: PPARA Intron Polymorphism Associated with Power Performance in 30-s Anaerobic Wingate Test
Source: PubMed Central journal article supplement (PMC4157815; doi:10.1371/journal.pone.0107171), 2014-09-08
Supplement: pone.0107171.s001.pdf [file pone.0107171.s001.pdf]

| subject ID | age | height | weight | body fat (kg) | body fat (%) | LBM (kg) | Pmax/kg | Pmax/ATH | PPARA ( <i>rs4253778</i> ) |
|------------|-----|--------|--------|---------------|--------------|----------|---------|----------|----------------------------|
| 1          | 27  | 187    | 102,0  | 9,0           | 8,8          | 93,0     | 14,2    | 15,7     | G/G                        |
| 2          | 24  | 186    | 76,0   | 4,0           | 5,3          | 72,0     | 13,9    | 14,7     | C/G                        |
| 3          | 24  | 170    | 66,0   | 4,0           | 6,1          | 62,0     | 14,0    | 15,0     | C/G                        |
| 4          | 27  | 173    | 72,0   | 6,0           | 8,3          | 66,0     | 12,0    | 13,1     | G/G                        |
| 5          | 24  | 181    | 81,0   | 6,0           | 7,4          | 75,0     | 13,2    | 14,3     | G/G                        |
| 6          | 23  | 168    | 61,0   | 4,0           | 6,6          | 57,0     | 12,1    | 13,0     | G/G                        |
| 7          | 23  | 183    | 84,0   | 4,0           | 4,8          | 80,0     | 15,5    | 16,3     | G/G                        |
| 8          | 26  | 172    | 75,0   | 6,4           | 8,5          | 68,6     | 14,4    | 15,7     | C/G                        |
| 9          | 23  | 183    | 82,0   | 7,2           | 8,8          | 74,8     | 14,6    | 16,2     | G/G                        |
| 10         | 24  | 175    | 71,0   | 5,0           | 7,0          | 66,0     | 14,7    | 15,8     | C/G                        |
| 11         | 24  | 180    | 85,0   | 6,0           | 7,1          | 79,0     | 12,8    | 13,7     | C/G                        |
| 12         | 25  | 170    | 72,0   | 5,0           | 6,9          | 67,0     | 12,7    | 14,5     | C/G                        |
| 13         | 24  | 181    | 76,0   | 5,0           | 6,6          | 71,0     | 13,2    | 14,1     | G/G                        |
| 14         | 32  | 184    | 94,0   | 8,0           | 8,5          | 86,0     | 12,5    | 13,7     | C/G                        |
| 15         | 26  | 183    | 88,0   | 10,0          | 11,4         | 78,0     | 15,9    | 17,9     | G/G                        |
| 16         | 28  | 190    | 88,0   | 6,0           | 6,8          | 82,0     | 16,6    | 17,8     | G/G                        |
| 17         | 25  | 182    | 81,0   | 10,0          | 12,3         | 71,0     | 15,0    | 17,1     | G/G                        |
| 18         | 26  | 187    | 95,0   | 10,0          | 10,5         | 85,0     | 16,7    | 18,6     | G/G                        |
| 19         | 26  | 187    | 82,0   | 4,0           | 4,9          | 78,0     | 16,3    | 17,2     | C/G                        |
| 20         | 24  | 176    | 79,0   | 5,0           | 6,3          | 74,0     | 15,2    | 16,0     | G/G                        |
| 21         | 22  | 185    | 85,0   | 4,0           | 4,7          | 81,0     | 16,2    | 17,1     | G/G                        |
| 22         | 24  | 179    | 82,0   | 5,0           | 6,1          | 77,0     | 16,1    | 17,1     | C/G                        |
| 23         | 28  | 175    | 70,0   | 7,0           | 10,0         | 63,0     | 16,2    | 17,9     | C/G                        |
| 24         | 25  | 188    | 99,0   | 7,0           | 7,1          | 92,0     | 16,2    | 17,4     | C/G                        |
| 25         | 29  | 180    | 86,0   | 6,5           | 7,6          | 79,5     | 16,9    | 18,3     | C/C                        |
| 26         | 29  | 191    | 100,0  | 7,0           | 7,0          | 93,0     | 14,7    | 15,8     | G/G                        |
| 27         | 25  | 178    | 82,0   | 4,0           | 4,9          | 78,0     | 17,1    | 18,5     | C/G                        |
| 28         | 20  | 192    | 100,8  | 10,8          | 10,7         | 90,0     | 16,1    | 17,9     | C/G                        |
| 29         | 24  | 180    | 80,0   | 6,0           | 7,5          | 74,0     | 15,9    | 17,1     | C/G                        |
| 30         | 26  | 192    | 93,0   | 10,0          | 10,8         | 83,0     | 16,5    | 18,5     | G/G                        |
| 31         | 21  | 180    | 72,0   | 4,0           | 5,6          | 68,0     | 12,0    | 12,7     | G/G                        |
| 32         | 26  | 189    | 85,0   | 5,0           | 5,9          | 80,0     | 13,3    | 14,1     | G/G                        |
| 33         | 25  | 181    | 79,0   | 4,5           | 5,7          | 74,5     | 11,9    | 14,7     | G/G                        |
| 34         | 21  | 175    | 70,0   | 2,0           | 2,9          | 68,0     | 12,7    | 13,1     | C/G                        |
| 35         | 24  | 180    | 73,0   | 4,1           | 5,6          | 68,9     | 12,1    | 12,9     | G/G                        |
| 36         | 21  | 175    | 71,0   | 3,5           | 4,9          | 67,5     | 12,4    | 13,0     | G/G                        |
| 37         | 20  | 193    | 78,0   | 3,0           | 3,8          | 75,0     | 11,8    | 12,3     | G/G                        |
| 38         | 22  | 183    | 84,0   | 8,0           | 9,5          | 76,0     | 14,7    | 16,1     | C/G                        |
| 39         | 23  | 179    | 72,0   | 5,0           | 6,9          | 67,0     | 13,0    | 15,2     | C/G                        |
| 40         | 32  | 182    | 79,0   | 3,0           | 3,8          | 76,0     | 13,0    | 13,5     | G/G                        |
| 41         | 33  | 182    | 95,0   | 10,0          | 10,5         | 85,0     | 14,1    | 15,1     | C/G                        |
| 42         | 28  | 184    | 90,0   | 10,0          | 11,1         | 80,0     | 12,5    | 14,1     | G/G                        |
| 43         | 24  | 176    | 90,0   | 14,0          | 15,6         | 76,0     | 12,4    | 14,7     | G/G                        |
| 44         | 22  | 176    | 66,0   | 4,0           | 6,1          | 62,0     | 13,4    | 14,8     | C/G                        |
| 45         | 27  | 171    | 83,0   | 4,0           | 4,8          | 79,0     | 14,8    | 15,5     | C/G                        |
| 46         | 26  | 180    | 77,0   | 7,0           | 9,1          | 70,0     | 14,9    | 16,1     | G/G                        |
| 47         | 24  | 185    | 82,0   | 7,0           | 8,5          | 75,0     | 14,5    | 15,9     | C/G                        |
| 48         | 23  | 183    | 82,0   | 4,0           | 4,9          | 78,0     | 15,5    | 16,1     | G/G                        |
| 49         | 22  | 181    | 72,0   | 5,0           | 6,9          | 67,0     | 13,9    | 14,9     | C/C                        |
| 50         | 24  | 179    | 84,0   | 10,6          | 12,6         | 73,4     | 12,8    | 16,6     | G/G                        |
| 51         | 30  | 181    | 76,0   | 9,0           | 11,8         | 67,0     | 13,1    | 14,8     | G/G                        |
| 52         | 25  | 186    | 97,0   | 6,0           | 6,2          | 91,0     | 15,5    | 16,0     | C/C                        |
| 53         | 24  | 177    | 80,0   | 5,0           | 6,3          | 75,0     | 15,9    | 17,1     | C/G                        |
| 54         | 36  | 179    | 91,0   | 21,0          | 23,1         | 70,0     | 13,2    | 17,1     | G/G                        |
| 55         | 28  | 170    | 73,0   | 3,0           | 4,1          | 70,0     | 14,7    | 15,3     | C/C                        |
| 56         | 29  | 186    | 86,0   | 6,0           | 7,0          | 80,0     | 13,1    | 14,0     | G/G                        |
| 57         | 27  | 177    | 75,0   | 4,0           | 5,3          | 71,0     | 12,6    | 13,3     | G/G                        |
| 58         | 27  | 176    | 76,0   | 8,0           | 10,5         | 68,0     | 13,9    | 15,7     | C/C                        |
| 59         | 20  | 183    | 77,0   | 4,2           | 5,5          | 72,8     | 13,8    | 14,6     | G/G                        |
| 60         | 21  | 183    | 93,0   | 7,7           | 8,3          | 85,3     | 14,1    | 15,3     | C/G                        |
| 61         | 20  | 183    | 89,0   | 6,0           | 6,7          | 83,0     | 14,1    | 15,1     | C/G                        |
| 62         | 20  | 180    | 75,0   | 4,0           | 5,3          | 71,0     | 16,1    | 17,0     | C/G                        |
| 63         | 19  | 179    | 81,0   | 6,7           | 8,3          | 74,3     | 14,5    | 15,9     | C/G                        |
| 64         | 19  | 179    | 74,0   | 4,1           | 5,6          | 69,9     | 16,3    | 17,2     | G/G                        |
| 65         | 23  | 175    | 71,0   | 3,0           | 4,2          | 68,0     | 16,7    | 17,4     | C/G                        |
| 66         | 32  | 178    | 100,8  | 28,8          | 28,6         | 72,0     | 12,4    | 13,4     | C/C                        |
| 67         | 34  | 180    | 86,1   | 9,1           | 10,6         | 77,0     | 13,8    | 15,4     | G/G                        |
| 68         | 34  | 198    | 113,0  | 11,0          | 9,8          | 102,0    | 14,3    | 15,8     | C/G                        |
| 69         | 28  | 183    | 90,0   | 9,6           | 10,7         | 80,4     | 14,2    | 15,9     | C/G                        |
| 70         | 30  | 181    | 76,0   | 6,0           | 7,9          | 70,0     | 15,6    | 16,9     | G/G                        |
| 71         | 20  | 181    | 85,0   | 5,0           | 5,9          | 80,0     | 14,7    | 15,6     | G/G                        |
| 72         | 22  | 191    | 83,0   | 5,7           | 6,9          | 77,3     | 15,8    | 17,0     | C/G                        |
| 73         | 20  | 192    | 87,0   | 7,0           | 8,0          | 80,0     | 13,5    | 14,7     | C/G                        |
| 74         | 20  | 199    | 100,8  | 10,4          | 10,3         | 90,4     | 13,1    | 13,6     | C/C                        |
| 75         | 20  | 177    | 66,0   | 2,0           | 3,1          | 64,0     | 14,0    | 14,4     | G/G                        |
| 76         | 35  | 183    | 100,8  | 18,8          | 18,7         | 82,0     | 14,4    | 15,7     | G/G                        |
| 77         | 27  | 178    | 74,0   | 5,0           | 6,8          | 69,0     | 12,1    | 13,0     | G/G                        |

Supplementary Table S1. Descriptive data of the 77 ice-hockey players.  
LBM - lean body mass; Pmax/kg - relative peak power per body weight.
